# Supplementary material for: δ34S and Geochemical Analyses for the Determination of, and Discrimination between, Salt Samples of Different Geographic Origin: A Feasibility Study
Source: MDPI journal article supplement (doi:10.3390/foods12081572), 2023-04-07
Supplement: s1 [file s1]

[illegible]

| 159705<br>Meersalz, Algarve/Portugal<br>seasalt | 159706<br>Meersalz, Ibiza/Spain<br>seasalt | 155810-1<br>Altaussee<br>Austria AA-1<br>rocksalt | 155810-2<br>Altaussee<br>Austria AA-2<br>rocksalt | 155810-1-einged<br>precipitated<br>Austria AA-1<br>rocksalt-precip. | 155810-2-einged<br>precipitated<br>Austria AA-2<br>rocksalt-precip. | 155810 Korundn<br>corund mill<br>Austria AA-3<br>rocksalt-corund | 155811 Korundn<br>corund mill<br>Austria HA-3<br>rocksalt-corund | 155811-1<br>Hallein<br>Austria HA-1<br>rocksalt | 155811-2<br>Hallein<br>Austria HA-2<br>rocksalt |
|-------------------------------------------------|--------------------------------------------|---------------------------------------------------|---------------------------------------------------|---------------------------------------------------------------------|---------------------------------------------------------------------|------------------------------------------------------------------|------------------------------------------------------------------|-------------------------------------------------|-------------------------------------------------|
| UF - 953 / 2009                                 | UF - 954 / 2009                            | UF - 36 / 2010                                    | UF - 37 / 2010                                    | UF - 38 / 2010                                                      | UF - 39 / 2010                                                      | UF - 40 / 2010                                                   | UF - 41 / 2010                                                   | UF - 42 / 2010                                  | UF - 43 / 2010                                  |
| 20.7                                            | 21.7                                       | 11.7                                              | 12.2                                              |                                                                     |                                                                     |                                                                  |                                                                  | 11.3                                            | 11.3                                            |
| 0.66                                            | <0,05                                      | 0.15                                              | <0,05                                             | 0.10                                                                | <0,05                                                               | 0.30                                                             | 0.18                                                             | 0.16                                            | 0.21                                            |
| <0,1                                            | <0,1                                       | <0,1                                              | <0,1                                              | <0,1                                                                | <0,1                                                                | <0,1                                                             | <0,1                                                             | <0,1                                            | <0,1                                            |
| 18                                              | <10                                        | <10                                               | <10                                               | <10                                                                 | <10                                                                 | <10                                                              | <10                                                              | <10                                             | <10                                             |
| 5600                                            | 129                                        | 2090                                              | 725                                               | 3020                                                                | 830                                                                 | 3383                                                             | 1747                                                             | 1700                                            | 1490                                            |
| 3                                               | <2                                         | 46                                                | 11                                                | <2                                                                  | <2                                                                  | 71                                                               | 60                                                               | 27                                              | 36                                              |
| 1527                                            | 206                                        | 6717                                              | 2377                                              | 9420                                                                | 2663                                                                | 8957                                                             | 4217                                                             | 4267                                            | 3850                                            |
| 2403                                            | 1513                                       | 7200                                              | 2700                                              | 12100                                                               | 3350                                                                | 10300                                                            | 5373                                                             | 4837                                            | 4333                                            |
| <2                                              | <2                                         | <2                                                | <2                                                | <2                                                                  | <2                                                                  | <2                                                               | <2                                                               | <2                                              | <2                                              |
| <50                                             | <50                                        | 94                                                | 65                                                | <50                                                                 | <50                                                                 | 138                                                              | <50                                                              | <50                                             | <50                                             |
| 1.4                                             | <0,2                                       | 4.4                                               | 2.0                                               | 1.9                                                                 | 0.9                                                                 | 5.7                                                              | 0.9                                                              | 0.6                                             | 0.7                                             |
| 0.02                                            | <0,02                                      | 0.06                                              | 0.03                                              | 0.04                                                                | 0.03                                                                | 0.09                                                             | 0.04                                                             | 0.03                                            | 0.03                                            |
| <0,5                                            | <0,5                                       | <0,5                                              | <0,5                                              | <0,5                                                                | <0,5                                                                | <0,5                                                             | <0,5                                                             | <0,5                                            | <0,5                                            |
| <0,5                                            | <0,5                                       | <0,5                                              | <0,5                                              | <0,5                                                                | <0,5                                                                | 0.7                                                              | <0,5                                                             | <0,5                                            | <0,5                                            |
| <5                                              | <5                                         | <5                                                | <5                                                | <5                                                                  | <5                                                                  | <5                                                               | <5                                                               | <5                                              | <5                                              |
| <0,1                                            | <0,1                                       | <0,1                                              | <0,1                                              | <0,1                                                                | <0,1                                                                | <0,1                                                             | <0,1                                                             | <0,1                                            | <0,1                                            |
| <1                                              | <1                                         | <1                                                | <1                                                | <1                                                                  | <1                                                                  | <1                                                               | <1                                                               | <1                                              | <1                                              |
| <5                                              | <5                                         | <5                                                | <5                                                | <5                                                                  | <5                                                                  | <5                                                               | <5                                                               | <5                                              | <5                                              |
| 0.39                                            | <0,05                                      | 1.2                                               | 0.4                                               | 1.1                                                                 | 0.4                                                                 | 1.2                                                              | 0.2                                                              | 0.2                                             | 0.2                                             |
| 80                                              | 52                                         | 110                                               | 78                                                | 156                                                                 | 91                                                                  | 158                                                              | 141                                                              | 144                                             | 125                                             |
| <0,01                                           | <0,01                                      | 0.04                                              | 0.01                                              | <0,01                                                               | <0,01                                                               | 0.05                                                             | 0.03                                                             | 0.01                                            | 0.02                                            |
| <0,01                                           | <0,01                                      | <0,01                                             | <0,01                                             | <0,01                                                               | <0,01                                                               | <0,01                                                            | <0,01                                                            | <0,01                                           | <0,01                                           |
| 0.06                                            | <0,02                                      | 0.08                                              | 0.05                                              | <0,02                                                               | <0,02                                                               | 0.13                                                             | 0.03                                                             | 0.03                                            | 0.03                                            |
| <0,05                                           | <0,05                                      | <0,05                                             | <0,05                                             | <0,05                                                               | <0,05                                                               | <0,05                                                            | <0,05                                                            | <0,05                                           | <0,05                                           |
| <0,02                                           | <0,02                                      | <0,02                                             | <0,02                                             | <0,02                                                               | <0,02                                                               | <0,02                                                            | <0,02                                                            | <0,02                                           | <0,02                                           |
| <0,03                                           | <0,03                                      | <0,03                                             | <0,03                                             | <0,03                                                               | <0,03                                                               | <0,03                                                            | <0,03                                                            | <0,03                                           | <0,03                                           |
| <0,01                                           | <0,01                                      | 0.03                                              | 0.01                                              | 0.01                                                                | <0,01                                                               | 0.04                                                             | <0,01                                                            | <0,01                                           | <0,01                                           |
| <0,05                                           | <0,05                                      | <0,05                                             | <0,05                                             | <0,05                                                               | <0,05                                                               | <0,05                                                            | <0,05                                                            | <0,05                                           | <0,05                                           |
| <0,01                                           | <0,01                                      | 0.11                                              | <0,01                                             | 0.06                                                                | <0,01                                                               | 0.05                                                             | <0,01                                                            | <0,01                                           | <0,01                                           |
| 0.1                                             | <0,1                                       | 4.0                                               | 1.1                                               | 3.2                                                                 | 2.1                                                                 | 3.9                                                              | 2.8                                                              | 2.4                                             | 2.4                                             |
| <0,01                                           | <0,01                                      | 0.02                                              | <0,01                                             | 0.01                                                                | <0,01                                                               | 0.02                                                             | 0.02                                                             | 0.02                                            | 0.01                                            |
| <0,01                                           | <0,01                                      | 0.06                                              | 0.02                                              | 0.03                                                                | 0.01                                                                | 0.05                                                             | 0.05                                                             | 0.07                                            | 0.05                                            |
| <0,01                                           | <0,01                                      | <0,01                                             | <0,01                                             | <0,01                                                               | <0,01                                                               | <0,01                                                            | <0,01                                                            | <0,01                                           | <0,01                                           |
| <0,05                                           | <0,05                                      | <0,05                                             | <0,05                                             | <0,05                                                               | <0,05                                                               | <0,05                                                            | <0,05                                                            | <0,05                                           | <0,05                                           |
| <0,01                                           | <0,01                                      | 0.01                                              | <0,01                                             | <0,01                                                               | <0,01                                                               | 0.01                                                             | <0,01                                                            | <0,01                                           | <0,01                                           |
| <0,01                                           | <0,01                                      | <0,01                                             | <0,01                                             | <0,01                                                               | <0,01                                                               | <0,01                                                            | <0,01                                                            | <0,01                                           | <0,01                                           |
| <0,01                                           | <0,01                                      | 0.01                                              | <0,01                                             | <0,01                                                               | <0,01                                                               | 0.02                                                             | <0,01                                                            | <0,01                                           | <0,01                                           |
| <0,01                                           | <0,01                                      | <0,01                                             | <0,01                                             | <0,01                                                               | <0,01                                                               | <0,01                                                            | <0,01                                                            | <0,01                                           | <0,01                                           |
| <0,01                                           | <0,01                                      | <0,01                                             | <0,01                                             | <0,01                                                               | <0,01                                                               | <0,01                                                            | <0,01                                                            | <0,01                                           | <0,01                                           |
| <0,01                                           | <0,01                                      | <0,01                                             | <0,01                                             | <0,01                                                               | <0,01                                                               | <0,01                                                            | <0,01                                                            | <0,01                                           | <0,01                                           |
| <0,01                                           | <0,01                                      | <0,01                                             | <0,01                                             | <0,01                                                               | <0,01                                                               | <0,01                                                            | <0,01                                                            | <0,01                                           | <0,01                                           |
| <0,01                                           | <0,01                                      | <0,01                                             | <0,01                                             | <0,01                                                               | <0,01                                                               | <0,01                                                            | <0,01                                                            | <0,01                                           | <0,01                                           |
| <0,01                                           | <0,01                                      | <0,01                                             | <0,01                                             | <0,01                                                               | <0,01                                                               | <0,01                                                            | <0,01                                                            | <0,01                                           | <0,01                                           |
| <0,01                                           | <0,01                                      | <0,01                                             | <0,01                                             | <0,01                                                               | <0,01                                                               | <0,01                                                            | <0,01                                                            | <0,01                                           | <0,01                                           |
| <0,01                                           | <0,01                                      | <0,01                                             | <0,01                                             | <0,01                                                               | <0,01                                                               | <0,01                                                            | <0,01                                                            | <0,01                                           | <0,01                                           |
| <0,1                                            | <0,1                                       | <0,1                                              | <0,1                                              | <0,1                                                                | <0,1                                                                | <0,1                                                             | <0,1                                                             | <0,1                                            | <0,1                                            |
| <0,01                                           | <0,01                                      | 0.04                                              | 0.03                                              | 0.03                                                                | 0.03                                                                | 0.04                                                             | <0,01                                                            | <0,01                                           | <0,01                                           |
| 0.2                                             | 0.1                                        | 0.5                                               | 0.1                                               | 0.2                                                                 | <0,1                                                                | 0.5                                                              | 0.2                                                              | 0.2                                             | 0.1                                             |
| <0,5                                            | <0,5                                       | <0,5                                              | <0,5                                              | <0,5                                                                | <0,5                                                                | <0,5                                                             | <0,5                                                             | <0,5                                            | <0,5                                            |
| <0,01                                           | <0,01                                      | 0.03                                              | <0,01                                             | <0,01                                                               | <0,01                                                               | 0.03                                                             | 0.02                                                             | 0.02                                            | 0.02                                            |

| 155811-1-einged<br>precipitated<br>Austria HA-1<br>rocksalt-precip. | 155811-2-einged<br>precipitated<br>Austria HA-2<br>rocksalt-precip | 155070<br>eersalz Slowen<br>Slovenia<br>seasalt | 155599<br>Totes Meer Salz<br>Dead Sea Israel<br>salt cont. | Minimum<br>(above LOQ) | Maximum   |
|---------------------------------------------------------------------|--------------------------------------------------------------------|-------------------------------------------------|------------------------------------------------------------|------------------------|-----------|
| UF - 44 / 2010                                                      | UF - 45 / 2010                                                     | UF - 46 / 2010                                  | UF - 47 / 2010                                             |                        |           |
|                                                                     |                                                                    | 22.1                                            | 13.0                                                       |                        |           |
| 0.10                                                                | 0.09                                                               | 0.31                                            | 0.37                                                       | 0.06                   | 0.66      |
| <0,1                                                                | <0,1                                                               | <0,1                                            | <0,1                                                       | 0.00                   | 0.00      |
| <10                                                                 | <10                                                                | <10                                             | <10                                                        | 12.10                  | 18.47     |
| 1747                                                                | 1773                                                               | 2553                                            | 97200                                                      | 3.97                   | 97200.00  |
| <2                                                                  | <2                                                                 | 3                                               | 7                                                          | 3.17                   | 71.07     |
| 4827                                                                | 4650                                                               | 648                                             | 154667                                                     | 56.47                  | 154666.67 |
| 5680                                                                | 5540                                                               | 1667                                            | 568                                                        | 567.67                 | 12100.00  |
| <2                                                                  | <2                                                                 | <2                                              | <2                                                         | 0.00                   | 0.00      |
| <50                                                                 | <50                                                                | <50                                             | <50                                                        | 64.90                  | 137.67    |
| 0.2                                                                 | 0.3                                                                | 1.7                                             | 2.3                                                        | 0.24                   | 5.69      |
| 0.03                                                                | 0.03                                                               | <0,02                                           | 0.03                                                       | 0.02                   | 0.09      |
| <0,5                                                                | <0,5                                                               | 0.32                                            | 0.16                                                       | 0.16                   | 0.73      |
| <0,5                                                                | <0,5                                                               | <0,5                                            | <0,5                                                       | 0.67                   | 0.67      |
| <5                                                                  | <5                                                                 | <5                                              | <5                                                         | 0.00                   | 0.00      |
| <0,1                                                                | <0,1                                                               | <0,1                                            | <0,1                                                       | 0.00                   | 0.00      |
| <1                                                                  | <1                                                                 | <1                                              | 7.74                                                       | 7.74                   | 7.74      |
| <5                                                                  | <5                                                                 | 1.61                                            | 28.4                                                       | 1.61                   | 28.40     |
| 0.2                                                                 | 0.1                                                                | 0.21                                            | 139.00                                                     | 0.06                   | 139.00    |
| 153                                                                 | 164                                                                | 62                                              | 8                                                          | 0.11                   | 164.00    |
| <0,01                                                               | <0,01                                                              | <0,01                                           | <0,01                                                      | 0.01                   | 0.05      |
| <0,01                                                               | <0,01                                                              | <0,01                                           | <0,01                                                      | 0.00                   | 0.00      |
| <0,02                                                               | <0,02                                                              | 0.02                                            | 0.19                                                       | 0.02                   | 0.19      |
| <0,05                                                               | <0,05                                                              | <0,05                                           | <0,05                                                      | 0.00                   | 0.00      |
| <0,02                                                               | <0,02                                                              | <0,02                                           | <0,02                                                      | 0.02                   | 0.02      |
| <0,03                                                               | <0,03                                                              | <0,03                                           | <0,03                                                      | 0.00                   | 0.00      |
| <0,01                                                               | <0,01                                                              | <0,01                                           | <0,01                                                      | 0.01                   | 0.04      |
| <0,05                                                               | <0,05                                                              | <0,05                                           | <0,05                                                      | 0.00                   | 0.00      |
| <0,01                                                               | <0,01                                                              | <0,1                                            | 0.38                                                       | 0.05                   | 0.38      |
| 3.7                                                                 | 3.6                                                                | 0.7                                             | 0.15                                                       | 0.12                   | 4.04      |
| <0,01                                                               | 0.02                                                               | <0,1                                            | <0,1                                                       | 0.01                   | 0.02      |
| 0.02                                                                | 0.05                                                               | <0,1                                            | <0,1                                                       | 0.01                   | 0.07      |
| <0,01                                                               | <0,01                                                              | <0,01                                           | <0,01                                                      | 0.00                   | 0.00      |
| <0,05                                                               | <0,05                                                              | <0,05                                           | <0,05                                                      | 0.00                   | 0.00      |
| <0,01                                                               | <0,01                                                              | <0,01                                           | <0,01                                                      | 0.01                   | 0.01      |
| <0,01                                                               | <0,01                                                              | <0,01                                           | <0,01                                                      | 0.00                   | 0.00      |
| <0,01                                                               | <0,01                                                              | <0,01                                           | <0,01                                                      | 0.01                   | 0.02      |
| <0,01                                                               | <0,01                                                              | <0,01                                           | <0,01                                                      | 0.00                   | 0.00      |
| <0,01                                                               | <0,01                                                              | <0,01                                           | <0,01                                                      | 0.00                   | 0.00      |
| <0,01                                                               | <0,01                                                              | <0,01                                           | <0,01                                                      | 0.00                   | 0.00      |
| <0,01                                                               | <0,01                                                              | <0,01                                           | <0,01                                                      | 0.00                   | 0.00      |
| <0,01                                                               | <0,01                                                              | <0,01                                           | <0,01                                                      | 0.00                   | 0.00      |
| <0,01                                                               | <0,01                                                              | <0,01                                           | <0,01                                                      | 0.00                   | 0.00      |
| <0,1                                                                | <0,1                                                               | <0,1                                            | <0,1                                                       | 0.00                   | 0.00      |
| <0,01                                                               | <0,01                                                              | <0,01                                           | <0,01                                                      | 0.03                   | 0.04      |
| <0,1                                                                | 1.3                                                                | <0,1                                            | <0,1                                                       | 0.12                   | 1.28      |
| <0,5                                                                | <0,5                                                               | <0,5                                            | <0,5                                                       | 0.00                   | 0.00      |
| <0,01                                                               | <0,01                                                              | <0,01                                           | <0,01                                                      | 0.01                   | 0.10      |
